# Supplementary material
Source: ML conference proceedings conference paper supplement (https://openreview.net/forum?id=9Lo52ll_izs)
Supplement: supplementary_material [file attachment]

|   |        |   |       |   |     |   |       |   |             |   |      |
|---|--------|---|-------|---|-----|---|-------|---|-------------|---|------|
| x | NT     | ◁ | DA-OT | Y | DGR | ⌋ | DER++ | ⌋ | LWF         |   | MIC  |
| + | Random | ▷ | DA-DC | ⌋ | DER | ⌋ | MIR   | ⌋ | LWF-Distill | ○ | DDE* |
